# Supplementary material
Source: Springer Nature journal article supplement (https://www.springermedizin.de/resource/supplementary/12947_2007_167_MOESM1_ESM.pdf/9556370)

ADMISSION

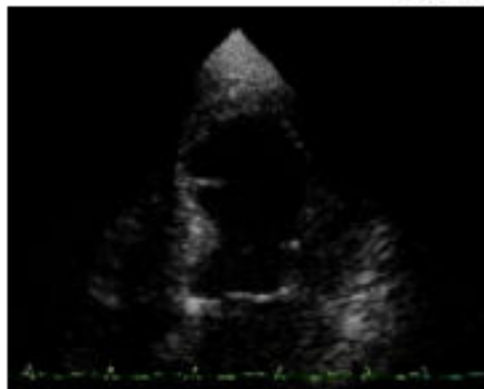

End-Diastolic

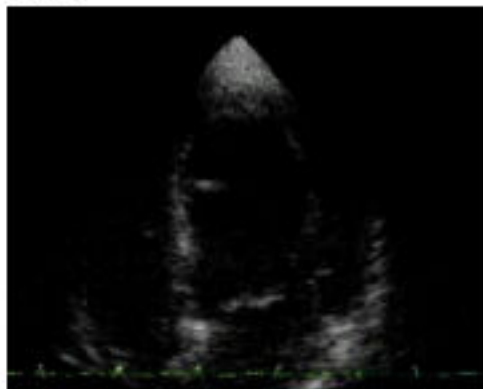

End-systolic

DISCHARGE

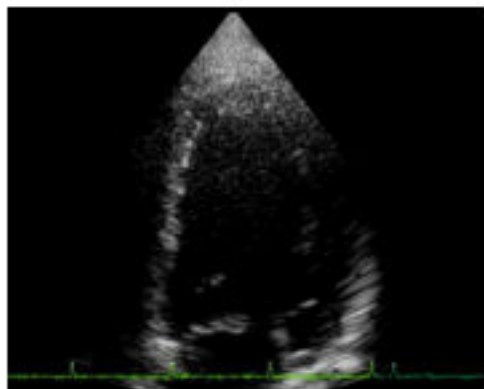

End-Diastolic

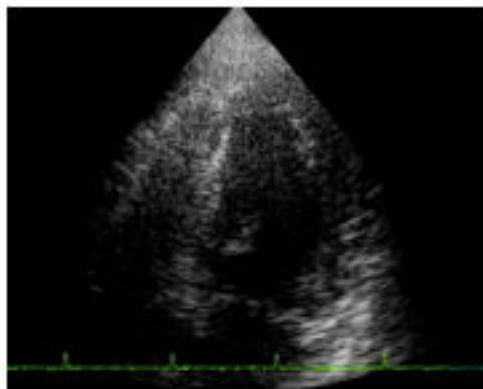

End-systolic

Supplement: MOESM1 [file 9556370]
